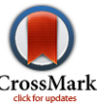

## Correction

# Correction: Towards a Methodology for Validation of Centrality Measures in Complex Networks

## The PLOS ONE Staff

The image and legend for Figure 1 are incorrect. The publisher apologizes for the error. Please see the correct Figure 1 here.

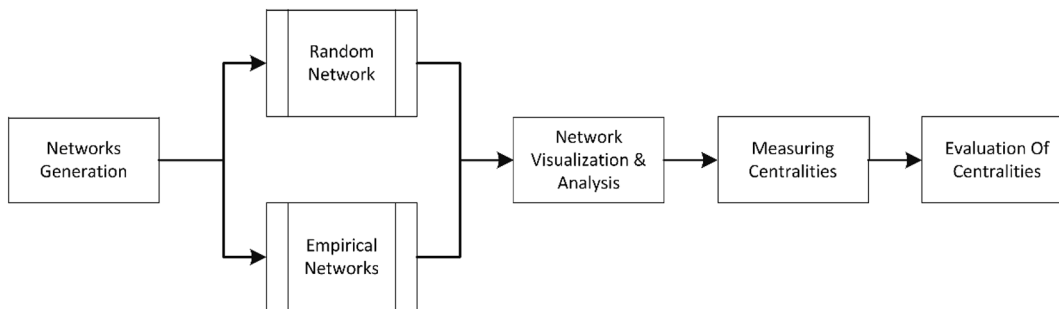

**Figure 1. Methodology Pipeline.**  
doi:10.1371/journal.pone.0090283.g001

## Reference

1. Batool K, Niazi MA (2014) Towards a Methodology for Validation of Centrality Measures in Complex Networks. PLoS ONE 9(4): e90283. doi:10.1371/journal.pone.0090283

**Citation:** The PLOS ONE Staff (2014) Correction: Towards a Methodology for Validation of Centrality Measures in Complex Networks. PLoS ONE 9(5): e98379. doi:10.1371/journal.pone.0098379

**Published:** May 16, 2014

**Copyright:** © 2014 The PLOS ONE Staff. This is an open-access article distributed under the terms of the Creative Commons Attribution License, which permits unrestricted use, distribution, and reproduction in any medium, provided the original author and source are credited.
